# Supplementary material
Source: publisher site journal article supplement (https://www.oncotarget.com/article/28502)
Supplement: Supplementary file 1 [file 28502]

## Addendum

**Addendum: Correlation between PD-L1 expression and *MET* gene amplification in patients with advanced non-small cell lung cancer and no other actionable oncogenic driver**

**Marta Domènech<sup>1,3</sup>, Ana M. Muñoz Marmol<sup>2</sup>, Jose Luis Mate<sup>2</sup>, Anna Estival<sup>1,3</sup>, Teresa Moran<sup>1,3</sup>, Marc Cucurull<sup>1,3</sup>, Maria Saigi<sup>1,3</sup>, Ainhoa Hernandez<sup>1,3</sup>, Carolina Sanz<sup>2</sup>, Alba Hernandez-Gallego<sup>2</sup>, Aintzane Urbizu<sup>2</sup>, Anna Martinez-Cardus<sup>3</sup>, Adrià Bernat<sup>3</sup> and Enric Carcereny<sup>1,3</sup>**

<sup>1</sup>Medical Oncology Department, Catalan Institute of Oncology Badalona, Germans Trias i Pujol Hospital, Badalona, Barcelona, Spain

<sup>2</sup>Pathology Department, Germans Trias i Pujol Hospital, Badalona, Barcelona, Spain

<sup>3</sup>Badalona Applied Research Group in Oncology (BARGO), Institut d'Investigació en Ciències de la Salut Germans Trias i Pujol (IGTP), Badalona, Barcelona, Spain

**Published:**

**Copyright:** © 2023 Domènech et al. This is an open access article distributed under the terms of the [Creative Commons Attribution License](#) (CC BY 4.0), which permits unrestricted use, distribution, and reproduction in any medium, provided the original author and source are credited.

**This article has an addendum:** No funding was used for this publication.

Original article: Oncotarget. 2021; 12:1802–1810. <https://doi.org/10.18632/oncotarget.28045>
